# Supplementary material for: Effects of Secondary Metabolites from Pea on Fusarium Growth and Mycotoxin Biosynthesis
Source: MDPI journal article supplement (doi:10.3390/jof7121004), 2021-11-24
Supplement: s1 [file s1]

## Effects of Secondary Metabolites from Pea on *Fusarium* Growth and Mycotoxin Synthesis

**Table S1:** Effect of isoorientin (1ng/ml, 10ng/ml and 100ng/ml) in the growth of *F. proliferatum* (PEA1 and PEA2) and *F. oxysporum* (34 OX and 1757 OX).

| Isoorientin  | PEA1    |        |         |          | PEA2    |        |         |          | 34 OX   |        |         |          | 1757 OX |        |         |          |
|--------------|---------|--------|---------|----------|---------|--------|---------|----------|---------|--------|---------|----------|---------|--------|---------|----------|
| <b>Day 2</b> | Control | 1ng/ml | 10ng/ml | 100ng/ml |
| Mean (cm)    | 1.7     | 1.65   | 1.7     | 1.85     | 1.75    | 1.9    | 1.8     | 2        | 1.6     | 1.45   | 1.25    | 1.3      | 2.1     | 2      | 2.1     | 2.2      |
| SD           | 0       | 0.07   | 0       | 0.07     | 0.07    | 0      | 0       | 0        | 0       | 0.07   | 0.07    | 0        | 0       | 0      | 0       | 0.14     |
| <b>Day 4</b> | Control | 1ng/ml | 10ng/ml | 100ng/ml |
| Mean (cm)    | 3.7     | 3.8    | 3.8     | 3.95     | 3.8     | 4      | 3.95    | 4.05     | 3.45    | 3.2    | 3.05    | 3.15     | 4.8     | 4.7    | 4.75    | 4.8      |
| SD           | 0.14    | 0      | 0       | 0.07     | 0       | 0.14   | 0.07    | 0.07     | 0.07    | 0      | 0.07    | 0.07     | 0       | 0      | 0.07    | 0        |
| <b>Day 6</b> | Control | 1ng/ml | 10ng/ml | 100ng/ml |
| Mean (cm)    | 5.35    | 5.8    | 5.8     | 6        | 5.6     | 5.9    | 5.7     | 5.9      | 5.3     | 4.55   | 4.7     | 4.7      | 6.95    | 6.8    | 6.95    | 7        |
| SD           | 0.2     | 0      | 0       | 0        | 0       | 0      | 0       | 0        | 0       | 0.07   | 0       | 0        | 0.07    | 0      | 0.07    | 0        |

**Table S2:** Effect of chlorogenic acid (1ng/ml, 10ng/ml and 100ng/ml) in the growth of *F. proliferatum* (PEA1 and PEA2) and *F. oxysporum* (34 OX and 1757 OX).

| Chlorogenic acid | PEA1    |        |         |          | PEA2    |        |         |          | 34 OX   |        |         |          | 1757 OX |        |         |          |
|------------------|---------|--------|---------|----------|---------|--------|---------|----------|---------|--------|---------|----------|---------|--------|---------|----------|
| <b>Day 2</b>     | Control | 1ng/ml | 10ng/ml | 100ng/ml |
| Mean (cm)        | 1.7     | 1.7    | 1.9     | 1.65     | 1.75    | 2.15   | 1.8     | 1.9      | 1.6     | 1.4    | 1.35    | 1.35     | 2.1     | 2.2    | 2.2     | 2.1      |
| SD               | 0       | 0      | 0       | 0.07     | 0.07    | 0.63   | 0       | 0        | 0       | 0      | 0.07    | 0.07     | 0       | 0.14   | 0       | 0        |
| <b>Day 4</b>     | Control | 1ng/ml | 10ng/ml | 100ng/ml |
| Mean (cm)        | 3.7     | 3.85   | 4       | 3.6      | 3.8     | 3.6    | 3.8     | 4        | 3.45    | 3.15   | 3.15    | 3.25     | 4.8     | 4.75   | 4.75    | 4.65     |
| SD               | 0.14    | 0.07   | 0       | 0        | 0       | 0      | 0       | 0.14     | 0.07    | 0.07   | 0.07    | 0.07     | 0       | 0.07   | 0.07    | 0.07     |
| <b>Day 6</b>     | Control | 1ng/ml | 10ng/ml | 100ng/ml |
| Mean (cm)        | 5.35    | 5.8    | 5.8     | 5.9      | 5.6     | 5.6    | 5.7     | 5.8      | 5.3     | 4.75   | 4.5     | 4.8      | 6.95    | 6.9    | 6.8     | 6.7      |
| SD               | 0.21    | 0      | 0       | 0        | 0       | 0      | 0       | 0.14     | 0       | 0.07   | 0       | 0        | 0.07    | 0      | 0       | 0        |

**Table S3:** Effect of apiin (1ng/ml, 10ng/ml and 100ng/ml) in the growth of *F. proliferatum* (PEA1 and PEA2) and *F. oxysporum* (34 OX and 1757 OX).

| Apiin        | PEA1    |        |         |          | PEA2    |        |         |          | 34 OX   |        |         |          | 1757 OX |        |         |          |
|--------------|---------|--------|---------|----------|---------|--------|---------|----------|---------|--------|---------|----------|---------|--------|---------|----------|
| <b>Day 2</b> | Control | 1ng/ml | 10ng/ml | 100ng/ml |
| Mean (cm)    | 1.7     | 1.7    | 1.65    | 1.55     | 1.75    | 1.7    | 1.6     | 1.55     | 1.6     | 1.45   | 1.3     | 1.1      | 2.1     | 2.2    | 2.3     | 2.15     |
| SD           | 0       | 0      | 0.21    | 0.07     | 0.07    | 0      | 0       | 0.07     | 0       | 0.07   | 0.14    | 0        | 0       | 0      | 0       | 0.07     |
| <b>Day 4</b> | Control | 1ng/ml | 10ng/ml | 100ng/ml |
| Mean (cm)    | 3.8     | 3.65   | 3.8     | 3.8      | 3.8     | 3.8    | 3.8     | 3.55     | 3.45    | 3.3    | 3.2     | 3        | 4.8     | 4.9    | 4.8     | 4.8      |
| SD           | 0       | 0.07   | 0       | 0        | 0       | 0      | 0       | 0.07     | 0.07    | 0      | 0       | 0        | 0       | 0      | 0       | 0        |
| <b>Day 6</b> | Control | 1ng/ml | 10ng/ml | 100ng/ml |
| Mean (cm)    | 5.35    | 5.6    | 5.7     | 5.7      | 5.6     | 5.5    | 5.5     | 5.3      | 5.3     | 4.7    | 4.7     | 4.7      | 6.95    | 7      | 7       | 7        |
| SD           | 0.21    | 0.14   | 0       | 0        | 0       | 0      | 0.14    | 0.14     | 0       | 0      | 0       | 0        | 0.07    | 0      | 0       | 0        |

**Table S4:** Effect of quercetin (1ng/ml, 10ng/ml and 100ng/ml) in the growth of *F. proliferatum* (PEA1 and PEA2) and *F. oxysporum* (34 OX and 1757 OX).

| Quercetin    | PEA1    |        |         |          | PEA2    |        |         |          | 34 OX   |        |         |          | 1757 OX |        |         |          |
|--------------|---------|--------|---------|----------|---------|--------|---------|----------|---------|--------|---------|----------|---------|--------|---------|----------|
| <b>Day 2</b> | Control | 1ng/ml | 10ng/ml | 100ng/ml |
| Mean (cm)    | 1.7     | 1.65   | 1.6     | 1.55     | 1.75    | 1.8    | 1.8     | 1.9      | 1.6     | 1.3    | 1.3     | 1.35     | 2.1     | 2.35   | 2.1     | 2.2      |
| SD           | 0       | 0.07   | 0       | 0.07     | 0.07    | 0      | 0       | 0        | 0       | 0      | 0       | 0.07     | 0       | 0.07   | 0       | 0.14     |
| <b>Day 4</b> | Control | 1ng/ml | 10ng/ml | 100ng/ml |
| Mean (cm)    | 3.7     | 3.45   | 3.6     | 3.8      | 3.8     | 3.8    | 3.9     | 3.8      | 3.45    | 3.35   | 3.5     | 3.4      | 4.8     | 4.8    | 4.6     | 4.65     |
| SD           | 0.14    | 0.21   | 0       | 0        | 0       | 0      | 0.14    | 0        | 0.07    | 0.07   | 0       | 0        | 0       | 0      | 0.14    | 0.07     |
| <b>Day 6</b> | Control | 1ng/ml | 10ng/ml | 100ng/ml |
| Mean (cm)    | 5.35    | 5.5    | 5.55    | 5.6      | 5.6     | 5.6    | 5.7     | 5.6      | 5.3     | 5      | 5.35    | 5        | 6.95    | 6.95   | 6.9     | 6.9      |
| SD           | 0.21    | 0      | 0.07    | 0        | 0       | 0      | 0       | 0.14     | 0       | 0      | 0.21    | 0        | 0.07    | 0.07   | 0       | 0        |

**Table S5:** Effect of coumarin (1ng/ml, 10ng/ml and 100ng/ml) in the growth of *F. proliferatum* (PEA1 and PEA2) and *F. oxysporum* (34 OX and 1757 OX).

| Coumarin     | PEA1    |        |         |          | PEA2    |        |         |          | 34 OX   |        |         |          | 1757 OX |        |         |          |
|--------------|---------|--------|---------|----------|---------|--------|---------|----------|---------|--------|---------|----------|---------|--------|---------|----------|
| <b>Day 2</b> | Control | 1ng/ml | 10ng/ml | 100ng/ml |
| Mean (cm)    | 1.7     | 1.5    | 1.55    | 1.55     | 1.75    | 2.1    | 1.7     | 1.6      | 1.6     | 1.5    | 1.4     | 1.35     | 2.1     | 2.35   | 2       | 2.35     |
| SD           | 0       | 0      | 0.07    | 0.07     | 0.07    | 0      | 0       | 0        | 0       | 0      | 0       | 0.07     | 0       | 0.07   | 0       | 0.07     |
| <b>Day 4</b> | Control | 1ng/ml | 10ng/ml | 100ng/ml |
| Mean (cm)    | 3.7     | 3.7    | 3.85    | 3.6      | 3.8     | 4.2    | 3.85    | 3.6      | 3.45    | 3.35   | 3.1     | 3.05     | 4.8     | 4.9    | 4.7     | 4.7      |
| SD           | 0.14    | 0      | 0.07    | 0        | 0       | 0      | 0.07    | 0        | 0.07    | 0.07   | 0       | 0.07     | 0       | 0      | 0       | 0        |
| <b>Day 6</b> | Control | 1ng/ml | 10ng/ml | 100ng/ml |
| Mean (cm)    | 5.35    | 5.55   | 5.3     | 5.3      | 5.6     | 6      | 5.7     | 5.65     | 5.3     | 5.05   | 4.8     | 4.8      | 6.95    | 7      | 6.6     | 6.75     |
| SD           | 0.21    | 0.07   | 0       | 0        | 0       | 0      | 0       | 0.07     | 0       | 0.07   | 0       | 0        | 0.07    | 0      | 0       | 0.07     |

**Table S6:** Effect of spermidine (1ng/ml, 10ng/ml and 100ng/ml) in the growth of *F. proliferatum* (PEA1 and PEA2) and *F. oxysporum* (34 OX and 1757 OX).

| spermidine   | PEA1    |        |         |          | PEA2    |        |         |          | 34 OX   |        |         |          | 1757 OX |        |         |          |
|--------------|---------|--------|---------|----------|---------|--------|---------|----------|---------|--------|---------|----------|---------|--------|---------|----------|
| <b>Day 2</b> | Control | 1ng/ml | 10ng/ml | 100ng/ml |
| Mean (cm)    | 1.7     | 1.8    | 1.5     | 1.5      | 1.75    | 2      | 1.6     | 1.8      | 1.6     | 1.5    | 1.35    | 1.25     | 2.1     | 2.45   | 2.35    | 2.3      |
| SD           | 0       | 0      | 0       | 0        | 0.07    | 0      | 0       | 0.14     | 0       | 0      | 0.07    | 0.07     | 0       | 0.07   | 0.07    | 0        |
| <b>Day 4</b> | Control | 1ng/ml | 10ng/ml | 100ng/ml |
| Mean (cm)    | 3.7     | 4.1    | 3.7     | 3.9      | 3.8     | 4.3    | 3.8     | 3.9      | 3.45    | 3.55   | 3.25    | 3.3      | 4.8     | 5.1    | 5       | 4.95     |
| SD           | 0.14    | 0.14   | 0.14    | 0        | 0       | 0      | 0       | 0.14     | 0.07    | 0.07   | 0.07    | 0        | 0       | 0      | 0       | 0.07     |
| <b>Day 6</b> | Control | 1ng/ml | 10ng/ml | 100ng/ml |
| Mean (cm)    | 5.35    | 5.85   | 5.5     | 5.85     | 5.6     | 6.1    | 5.5     | 5.65     | 5.3     | 5.1    | 4.7     | 4.7      | 6.95    | 7.45   | 7       | 6.9      |
| SD           | 0.21    | 0.07   | 0.14    | 0.07     | 0       | 0      | 0       | 0.21     | 0       | 0      | 0       | 0        | 0.07    | 0.07   | 0       | 0.14     |

**Table S7:** Effect of p- coumaric acid (1ng/ml, 10ng/ml and 100ng/ml) in the growth of *F. proliferatum* (PEA1 and PEA2) and *F. oxysporum* (34 OX and 1757 OX).

| p-Coumaric acid | PEA1    |        |         |          | PEA2    |        |         |          | 34 OX   |        |         |          | 1757 OX |        |         |          |
|-----------------|---------|--------|---------|----------|---------|--------|---------|----------|---------|--------|---------|----------|---------|--------|---------|----------|
| <b>Day 2</b>    | Control | 1ng/ml | 10ng/ml | 100ng/ml |
| Mean (cm)       | 1.7     | 1.7    | 1.75    | 1.6      | 1.75    | 1.75   | 1.65    | 1.65     | 1.6     | 1.55   | 1.6     | 1.65     | 2.1     | 2.15   | 2.2     | 2.15     |
| SD              | 0       | 0      | 0.07    | 0        | 0.07    | 0.07   | 0.07    | 0.07     | 0       | 0.07   | 0       | 0.07     | 0       | 0.07   | 0       | 0.07     |
| <b>Day 4</b>    | Control | 1ng/ml | 10ng/ml | 100ng/ml |
| Mean (cm)       | 3.8     | 3.9    | 3.8     | 3.75     | 3.8     | 3.95   | 3.95    | 3.7      | 3.45    | 3.7    | 3.55    | 3.5      | 4.8     | 4.6    | 4.6     | 4.85     |
| SD              | 0       | 0      | 0       | 0.07     | 0       | 0.07   | 0.07    | 0        | 0.07    | 0      | 0.07    | 0.28     | 0       | 0.14   | 0.14    | 0.07     |
| <b>Day 6</b>    | Control | 1ng/ml | 10ng/ml | 100ng/ml |
| Mean (cm)       | 5.35    | 5.6    | 5.55    | 5.55     | 5.6     | 5.5    | 5.5     | 5.25     | 5.3     | 5.55   | 5.65    | 5.4      | 6.95    | 6.85   | 6.8     | 6.925    |
| SD              | 0.21    | 0      | 0.07    | 0.07     | 0       | 0      | 0.14    | 0.07     | 0       | 0.07   | 0.07    | 0        | 0.07    | 0.07   | 0       | 0.03     |

**Table S8:** FB<sub>1</sub> and beauvericin produced in *F. proliferatum* (PEA1 and PEA2) *F. oxysporum* (34 OX and 1757 OX) liquid cultures upon addition of various concentrations of metabolites (mean values and standard errors). Calculated from replicate treatments, \*statistically significant.

| Treatments                           | Fumonisin B <sub>1</sub> (ng/μL) |          | Beauvericin (ng/μL) |      |
|--------------------------------------|----------------------------------|----------|---------------------|------|
|                                      | Mean                             | SE       | Mean                | SE   |
| PEA1 control                         | 5.21                             | 0.63     | 1.21                | 0.18 |
| PEA1 + apiin 100 ng/mL               | 0.73 *                           | 0.24     | 0 *                 | 0    |
| PEA1 + chlorogenic acid 100 ng/mL    | 0 *                              | 0        | 0 *                 | 0    |
| PEA1 + isoorientin 100 ng/mL         | 0 *                              | 0        | 0 *                 | 0    |
| PEA1 + quercetin 100 ng/mL           | 0.35 *                           | 0.02     | 0 *                 | 0    |
| PEA1 + spermidine 100 ng/mL          | 0.35 *                           | 0.177046 | 0 *                 | 0    |
| PEA2 control                         | 2.58                             | 0.46     | 1.07                | 0.54 |
| PEA2 +apiin 100 ng/mL                | 0 *                              | 0        | 0 *                 | 0    |
| PEA2 + coumarin 1 ng/mL              | 0.45 *                           | 0.003    | 0 *                 | 0    |
| PEA2 + chlorogenic acid 100 ng/mL    | 0.23 *                           | 0.02     | 0 *                 | 0    |
| PEA2 + isoorientin 100 ng/mL         | 0.45 *                           | 0.02     | 0 *                 | 0    |
| PEA2 + spermidine 1 ng/mL            | 0.57 *                           | 0.09     | 0 *                 | 0    |
| 34 OX control                        | 0                                | 0        | 0                   | 0    |
| 34 OX + apiin 10 ng/mL               | 0.58                             | 0.29     | 0                   | 0    |
| 34 OX + coumarin 10 ng/mL            | 0                                | 0        | 0                   | 0    |
| 34 OX + chlorogenic acid 10 ng/mL    | 0                                | 0        | 0                   | 0    |
| 34 OX + isoorientin 1 ng/mL          | 0.27                             | 0.14     | 0                   | 0    |
| 34 OX + quercetin 100 ng/mL          | 0                                | 0        | 0                   | 0    |
| 34 OX + spermidine 10 ng/mL          | 0.96                             | 0.48     | 0                   | 0    |
| 1757 OX control                      | 0                                | 0        | 0                   | 0    |
| 1757 OX + coumarin 10 ng/mL          | 0                                | 0        | 0                   | 0    |
| 1757 OX + chlorogenic acid 100 ng/mL | 0                                | 0        | 0                   | 0    |
| 1757 OX + spermidine 1 ng/mL         | 0                                | 0        | 0                   | 0    |

**Table S9:** FB<sub>1</sub> and beauvericin produced in *F. proliferatum* (PEA1 and PEA2) *F. oxysporum* (34 OX and 1757 OX) liquid cultures upon addition of various concentrations of p-coumaric acid (mean values and standard errors). Calculated from replicate treatments, \*statistically significant.

| Treatments                          | Fumonisin B <sub>1</sub> (ng/μL) |      | Beauvericin (ng/μL) |      |
|-------------------------------------|----------------------------------|------|---------------------|------|
|                                     | Mean                             | SE   | Mean                | SE   |
| PEA1 control                        | 0                                | 0    | 0                   | 0    |
| PEA1 + p-coumaric acid 1ng/mL       | 0                                | 0    | 0                   | 0    |
| PEA1 + p-coumaric acid 100 ng/mL    | 1.61                             | 0.80 | 0                   | 0    |
| PEA2 control                        | 50.73                            | 4.91 | 1.24                | 0.62 |
| PEA2 + p-coumaric acid 1 ng/mL      | 4.30 *                           | 1.74 | 0 *                 | 0    |
| PEA2 + p-coumaric acid 100 ng/mL    | 0 *                              | 0    | 0 *                 | 0    |
| 34 OX control                       | 0                                | 0    | 0                   | 0    |
| 34 OX + p-coumaric acid 1 ng/mL     | 0                                | 0    | 0                   | 0    |
| 34 OX + p-coumaric acid 100 ng/mL   | 0                                | 0    | 0                   | 0    |
| 1757 OX control                     | 0                                | 0    | 0                   | 0    |
| 1757 OX + p-coumaric acid 1 ng/mL   | 0                                | 0    | 0                   | 0    |
| 1757 OX + p-coumaric acid 100 ng/mL | 0                                | 0    | 0                   | 0    |
